# Supplementary material for: Chemical bath deposition of textured and compact zinc oxide thin films on vinyl-terminated polystyrene brushes
Source: publisher site journal article supplement (doi:10.3762/bjnano.7.12), 2016-01-25
Supplement: Additional file 1 [file 2190-4286-7-12-S1.pdf]

# Supporting Information

for

## **Chemical bath deposition of textured and compact zinc oxide thin films on vinyl-terminated polystyrene brushes**

Nina J. Blumenstein,<sup>1</sup> Caroline G. Hofmeister,<sup>1</sup> Peter Lindemann,<sup>2</sup> Cheng Huang,<sup>3,4</sup> Johannes Baier,<sup>1</sup> Andreas Leineweber,<sup>5</sup> Stefan Walheim\*<sup>3,4</sup> Christof Wöll,<sup>2</sup> Thomas Schimmel<sup>3,4</sup> and Joachim Bill\*<sup>1</sup>

Address: <sup>1</sup>Institute for Materials Science, University of Stuttgart, Heisenbergstrasse 3, D-70569 Stuttgart, Germany and <sup>2</sup>Institute of Functional Interfaces, Karlsruhe Institute of Technology (KIT), Hermann-von-Helmholtz-Platz 1, D-76344 Eggenstein-Leopoldshafen, Germany and <sup>3</sup>Institute of Applied Physics and Center for Functional Nanostructures, Karlsruhe Institute of Technology (KIT), Wolfgang-Gaede-Strasse 1, D-76131 Karlsruhe, Germany and <sup>4</sup>Institute of Nanotechnology, Karlsruhe Institute of Technology (KIT), Hermann-von-Helmholtz-Platz 1, D-76344 Eggenstein-Leopoldshafen, Germany and <sup>5</sup>Max Planck Institute for Intelligent Systems, Heisenbergstrasse 3, D-70569 Stuttgart, Germany

Email: Joachim Bill\* - bill@imw.uni-stuttgart.de;

Stefan Walheim\* - stefan.walheim@kit.edu

\*Corresponding author

## **Results of IRRAS measurements on the PS brushes grafted to Si before and after modification**

In order to obtain more information about the transesterification, infrared reflection absorption spectroscopy (IRRAS) measurements were performed on polystyrene brushes (Figure S1). The bands at 2928 and 2850  $\text{cm}^{-1}$  can be assigned to the  $\text{CH}_2$ -asymmetric and symmetric stretching modes  $\nu(\text{CH}_2)$  of the backbone, respectively. A band arising from aromatic H-stretching mode can be found at 3025  $\text{cm}^{-1}$ . A large band at 1688  $\text{cm}^{-1}$  originating from amide I indicates that there seems to be some residual polyvinylpyrrolidone present. Comparing the relative intensities of the bands at 3025 and 2928  $\text{cm}^{-1}$  before and after treatment indicates a decrease in relative intensity for the aromatic band. This is expected, since the main part of the molecule is being removed from the substrate surface during the modification.

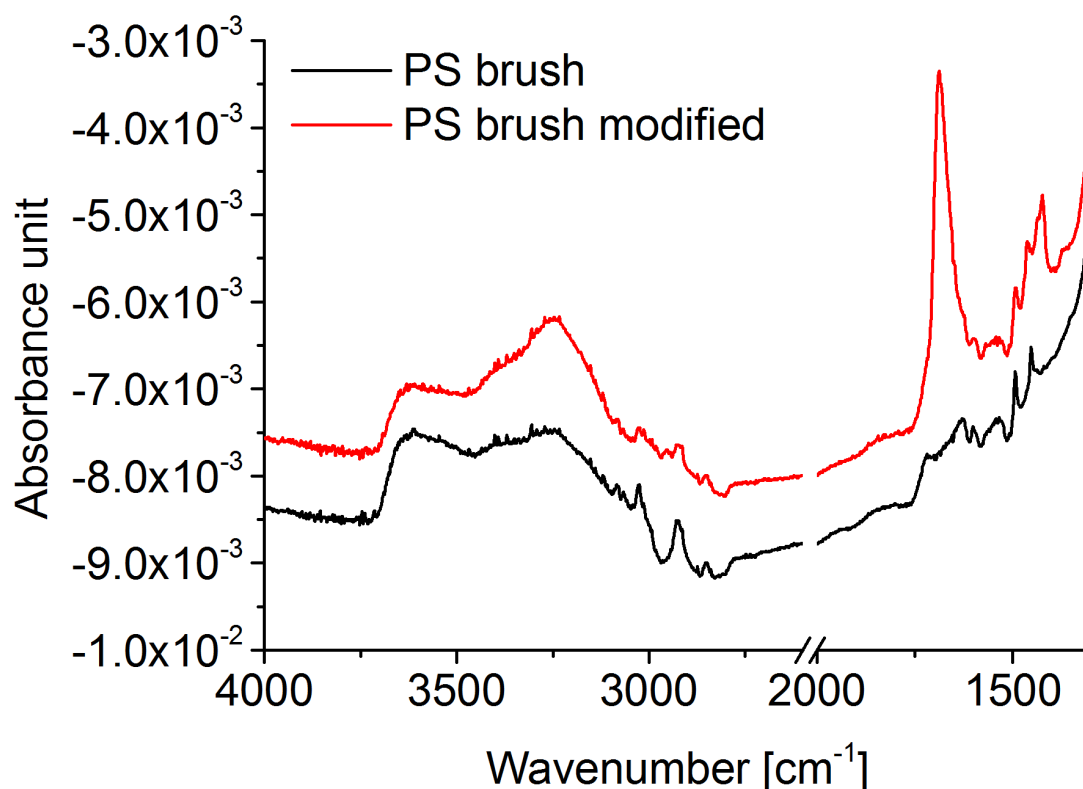

**Figure S1:** IRRAS spectra of PS brushes before and after modification.
